# Supplementary material for: Poly(thymine)-templated fluorescent copper nanoparticles for label-free detection of N-acetylcysteine in pharmaceutical samples
Source: Royal Society of Chemistry journal article supplement (doi:10.1039/c5ay00841g), 2015-01-01
Supplement: c5ay00841g1.pdf [file c5ay00841g1.pdf]

**Electronic Supplementary Information (ESI)**  
**for**  
**Poly(thymine)-templated fluorescent copper nanoparticles**  
**for label-free detection of N-acetylcysteine in pharmaceutical**  
**samples**

Hai-Bo Wang,<sup>\*a</sup> Hong-Ding Zhang,<sup>a</sup> Ying Chen,<sup>a</sup> Li-Juan Ou,<sup>\*b</sup> and  
Yan-Ming Liu<sup>a</sup>

<sup>a</sup>*College of Chemistry and Chemical Engineering, Xinyang Normal University,  
Xinyang 464000, PR China*

<sup>b</sup>*College of Material and Chemical Engineering, Hunan Institute of Technology,  
Hengyang 421002, PR China*

Tel.: +86 376 6391172; Fax: +86 376 6391172.

E-mail address: wanghaibohn@163.com (H.-B. Wang); oulijuanann@aliyun.com  
(L.-J. Ou).

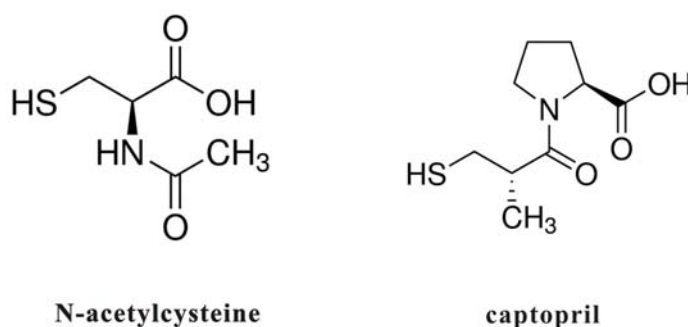

**Fig. S1** The chemical structure of N-acetylcysteine (NAC) and captopril.

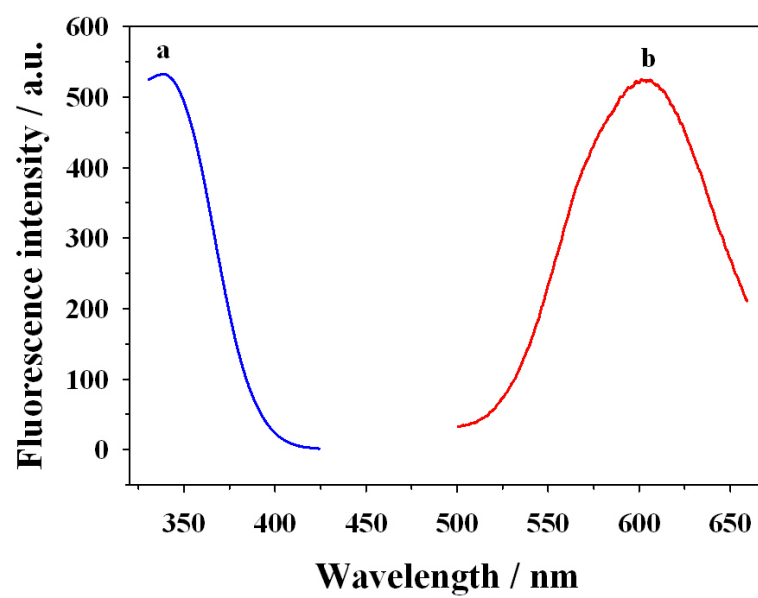

**Fig. S2** Fluorescence excitation (a) and emission (b) spectra of the poly T templated copper nanoparticles.

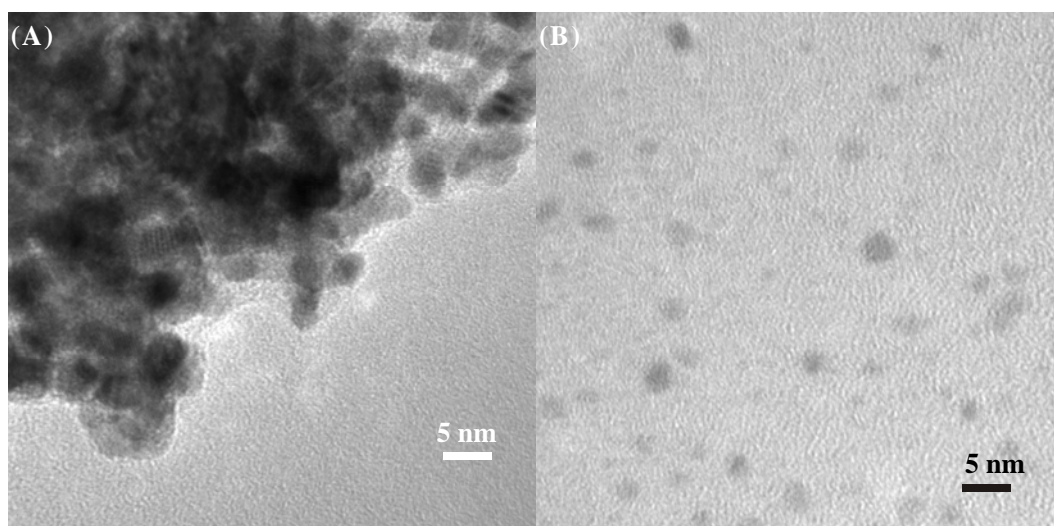

**Fig. S3** (A) Typical TEM image of poly T-templated Cu NPs. (B) TEM image of poly T-templated Cu NPs in the presence of 100  $\mu$ M NAC.

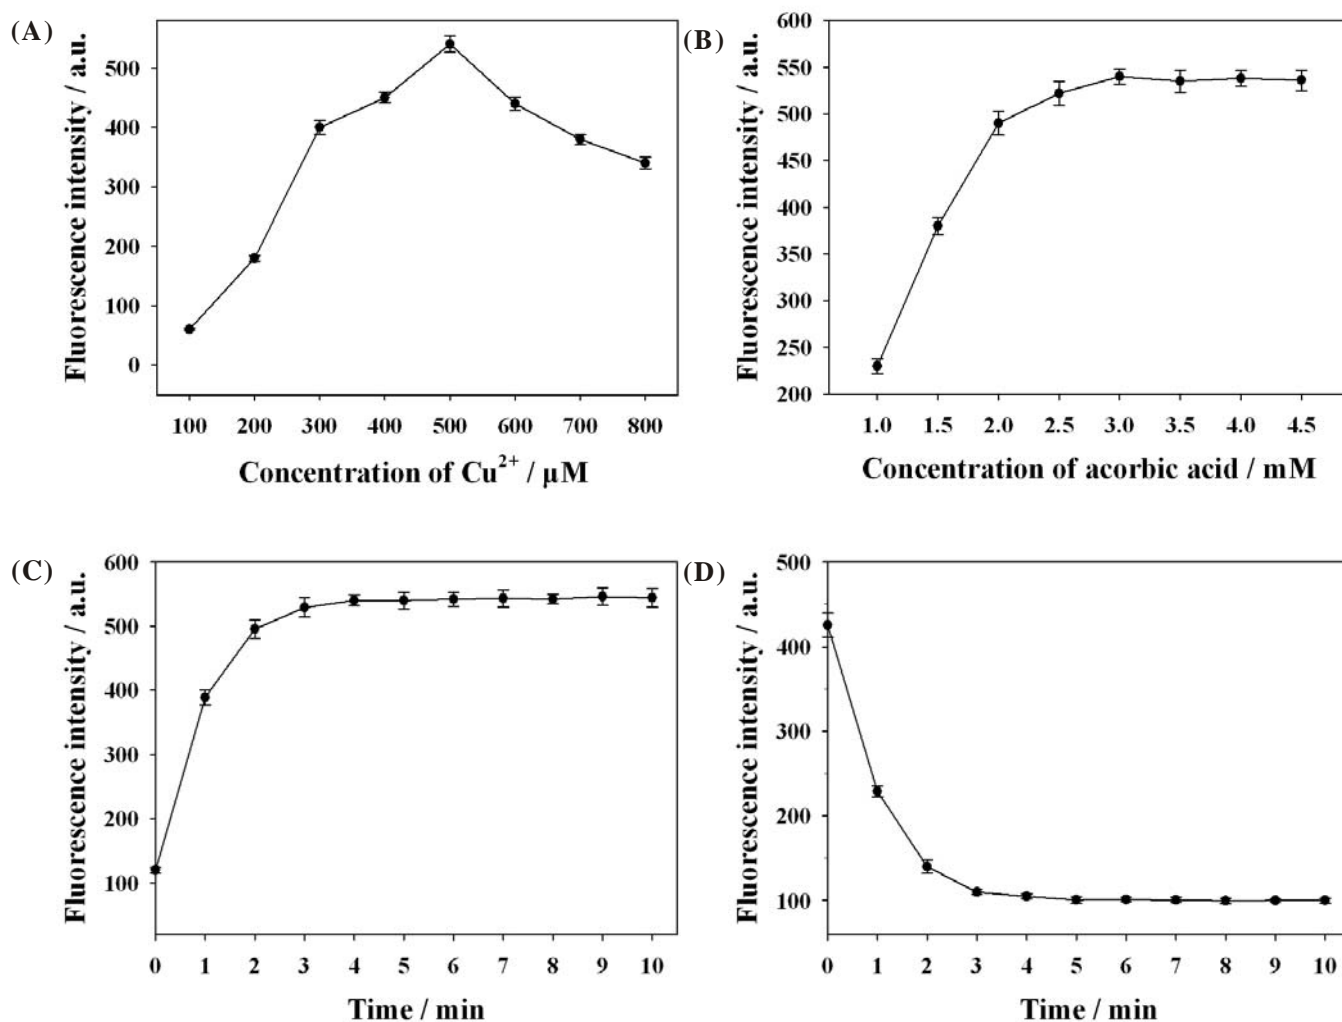

**Fig. S4** (A) The effect of  $\text{Cu}^{2+}$  concentration on the fluorescence intensity of poly T templated Cu NPs. (B) The effect of ascorbic acid concentration on the fluorescence intensity of the poly T templated Cu NPs. (C) The effect of incubation time of ascorbic acid on the fluorescence intensity of the poly T templated Cu NPs. (D) The effect of incubation time of NAC on the fluorescence intensity of the poly T templated Cu NPs.
